# Supplementary material for: Geochemical, Mineralogical and Morphological Characterisation of Road Dust and Associated Health Risks
Source: PubMed Central journal article supplement (PMC7084894; doi:10.3390/ijerph17051563), 2020-02-28
Supplement: ijerph-17-01563-s001.pdf [file ijerph-17-01563-s001.pdf]

## Supplemental Materials for

# Geochemical, Mineralogical and Morphological Characterisation of Road Dust and Associated Health Risks

Carla Candeias<sup>1</sup>, Estela Vicente<sup>2</sup>, Mário Tomé<sup>3</sup>, Fernando Rocha<sup>1</sup>, Paula Ávila<sup>4</sup>, Célia Alves<sup>2\*</sup>

<sup>1</sup> Geobiosciences, Geotechnologies and Geoenvironment Research Centre (GeoBioTec), Department of Geosciences, University of Aveiro, 3810-193 Aveiro, Portugal

<sup>2</sup> Centre for Environmental and Marine Studies (CESAM), Department of Environment, University of Aveiro, 3810-193 Aveiro, Portugal

<sup>3</sup> School of Technology and Management (ESTG), Polytechnic Institute of Viana do Castelo, Avenida do Atlântico, nº 644, 4900-348 Viana do Castelo, Portugal

<sup>4</sup> LNEG, National Laboratory of Energy and Geology, São Mamede de Infesta, Portugal

\* Correspondence: [celia.alves@ua.pt](mailto:celia.alves@ua.pt)

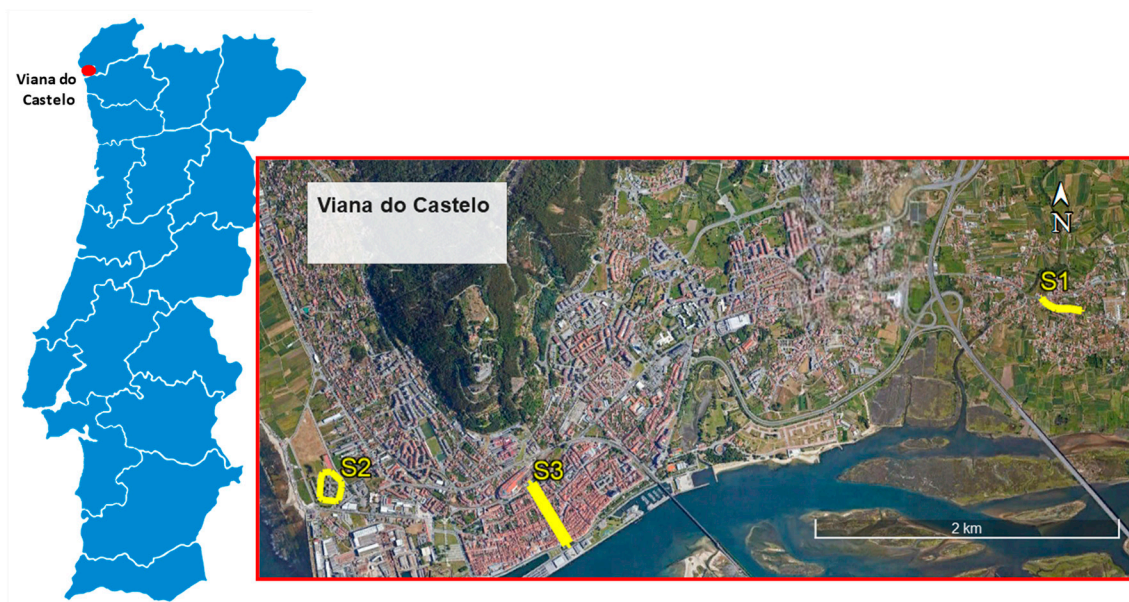

**Fig. S1.** Location of the sampling sites. Street 1 (S1) – suburban - Rua Alto Xisto, street with cobbled pavement made of granite cubes in a residential area; Street 2 (S2) - urban - road surrounding the campus of the Higher School of Technology and Management; Street 3 (S3) – urban - Avenida Combatentes da Grande Guerra, central artery connecting to the train station.

- Parameters used in the calculations of sections 2.3 and 2.4

Earth's crust individual elemental composition from Riemann and de Caritat [20]:

Al 77440 mg kg<sup>-1</sup>; As 2 mg kg<sup>-1</sup>; Ba 668 mg kg<sup>-1</sup>; Br 1.6 mg kg<sup>-1</sup>; Ca 29,450 mg kg<sup>-1</sup>; Cl 640 mg kg<sup>-1</sup>; Cr 35 mg kg<sup>-1</sup>; Cu 14.3 mg kg<sup>-1</sup>; F 611 mg kg<sup>-1</sup>; Fe 30,890 mg g<sup>-1</sup>; Ga 14 mg kg<sup>-1</sup>; K 28,650 mg g<sup>-1</sup>; Mg 13,510 mg kg<sup>-1</sup>; Mn 527 mg kg<sup>-1</sup>; Mo 1.4 mg kg<sup>-1</sup>; Na 25,670 mg kg<sup>-1</sup>; Ni 18.6 mg kg<sup>-1</sup>; P 665 mg kg<sup>-1</sup>; Pb 17 mg kg<sup>-1</sup>; Rb 110 mg kg<sup>-1</sup>; S 953 mg kg<sup>-1</sup>; Sb 0.31 mg kg<sup>-1</sup>; Si 30,3480 mg kg<sup>-1</sup>; Sn 2.5 mg kg<sup>-1</sup>; Sr 316 mg kg<sup>-1</sup>; Ti 3117 mg kg<sup>-1</sup>; V 53 mg kg<sup>-1</sup>; W 1.4 mg kg<sup>-1</sup>; Zn 52 mg g<sup>-1</sup>; Zr 237 mg kg<sup>-1</sup>.

Values of reference doses ( $RfD_{route}$ ), cancer slope factors (CSF), gastrointestinal absorption factors ( $ABS_{gi}$ ) and inhalation unit risk (IUR) were taken from RAIS [24]:

$RfD_{route} - RfD_{ing}$  (mg kg<sup>-1</sup> d<sup>-1</sup>) - As  $3 \times 10^{-4}$ ;  $RfD_{drm} - RfD_{ing} \times ABS_{gi}$ ;  $RfD_{inh}$  (mg m<sup>-3</sup>) - As  $1.5 \times 10^{-5}$

CSF -  $CSF_{ing}$  ((mg·kg<sup>-1</sup> d<sup>-1</sup>)<sup>-1</sup>) - As 1.50; Pb  $8.5 \times 10^{-3}$ ;  $CSF_{drm} - CSF_{ing}/ABS_{gi}$

$ABS_{gi} - ABS_{gi}$  - As 1.00; Pb 1.00;  $ABS_{drm} - As$  0.03

IUR -  $IUR$  (( $\mu$ g m<sup>-3</sup>)<sup>-1</sup>) - As  $4.3 \times 10^{-3}$ ; Pb  $1.2 \times 10^{-5}$

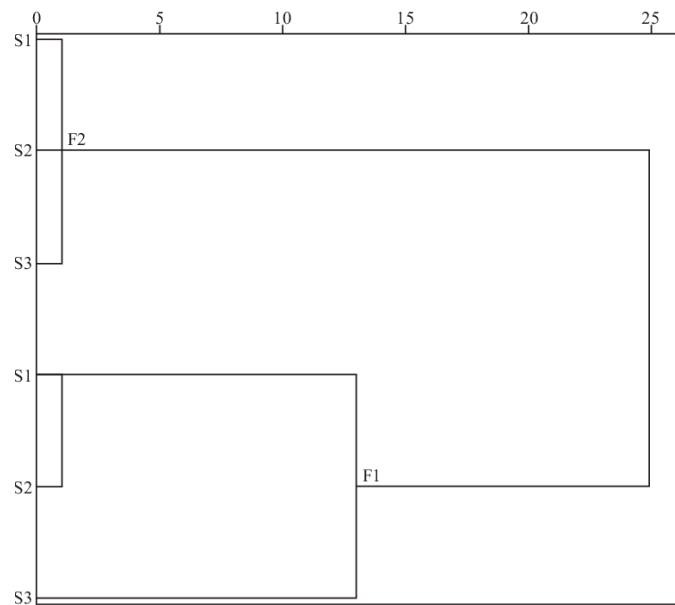

**Fig. S2.** Cluster analysis of the XRF results of road dust samples (S1 suburban environment influenced by agricultural activities; S2 and S3 urban streets).

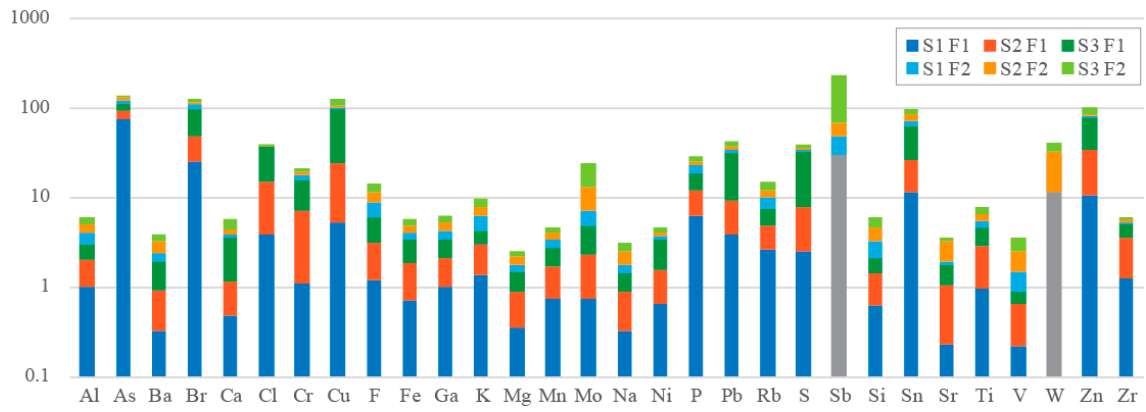

**Fig. S3.** Enrichment index for elements detected in road dust fractions (F1 – below 74  $\mu\text{m}$ , F2 – between 74  $\mu\text{m}$  and 1 mm). Below detection limit concentrations of Sb and W are represented in grey colour.
